# Supplementary material for: In Vitro Studies on 3D-Printed PLA/HA/GNP Structures for Bone Tissue Regeneration
Source: MDPI journal article supplement (doi:10.3390/biomimetics9010055), 2024-01-19
Supplement: s1 [file s1]

## Supplementary Material

Andreea-Mariana Negrescu <sup>1</sup>, Aura-Cătălina Mocanu <sup>2</sup>, Florin Miculescu <sup>2</sup>, Valentina Mitran <sup>1</sup>,  
Andreea-Elena Constantinescu <sup>2</sup> and Anisoara Cimpean <sup>1,\*</sup>

<sup>1</sup> Department of Biochemistry and Molecular Biology, Faculty of Biology, University of Bucharest, 91-95 Splaiul Independentei, 050095 Bucharest, Romania; andreea.ne94@gmail.com (A.-M.N.); valentina.mitran@bio.unibuc.ro (V.M.)

<sup>2</sup> Department of Metallic Materials Science, Physical Metallurgy, National University of Science and Technology Politehnica Bucharest, 313 Splaiul Independentei, J Building, District 6, 060042 Bucharest, Romania; mcn\_aura@hotmail.com (A.-C.M.); f\_miculescu@yahoo.com (F.M.); andreea-elena01c@gmail.com (A.-E.C.)

\* Correspondence: anisoara.cimpean@bio.unibuc.ro; Tel.: +40-21-318-1575 (ext. 106)

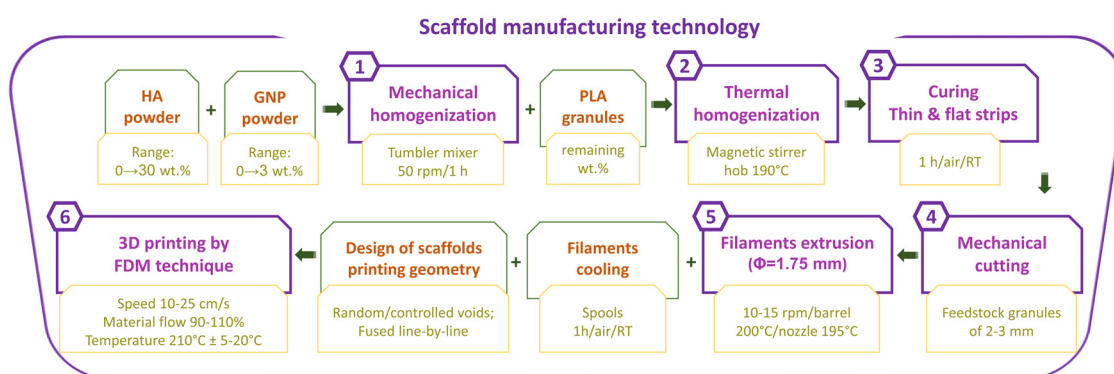

**Figure S1.** Scaffold manufacturing - graphical presentation.

A1. TCPS (-) TCPS (+)

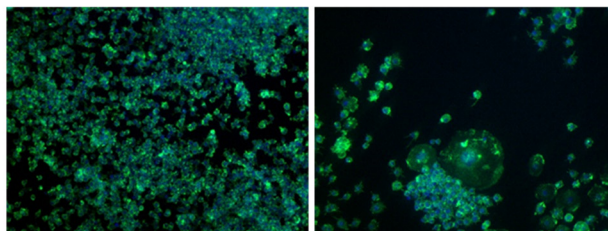

B1.

| Sample (-LPS) |        | Total number of nuclei | Number of nuclei in multinuclear cells | Multinuclear index (%) |
|---------------|--------|------------------------|----------------------------------------|------------------------|
| 0 % GNP       | 0% HA  | 26                     | 3                                      | 11.5%                  |
|               | 10% HA | 85                     | 3                                      | 3.5%                   |
|               | 20% HA | 63                     | 4                                      | 6.3%                   |
|               | 30% HA | 38                     | 0                                      | 0%                     |
| TCPS (-)      |        | 324                    | 3                                      | 0.9%                   |

  

| Sample (+LPS) |        | Total number of nuclei | Number of nuclei in multinucleate cells | Multinuclear index (%) |
|---------------|--------|------------------------|-----------------------------------------|------------------------|
| 0 % GNP       | 0% HA  | 62                     | 0                                       | 0%                     |
|               | 10% HA | 48                     | 3                                       | 6.25%                  |
|               | 20% HA | 51                     | 3                                       | 5.8%                   |
|               | 30% HA | 28                     | 0                                       | 0%                     |
| TCPS (+)      |        | 30                     | 8                                       | 26.6%                  |

**Note:** Due to its composition and huge number of cells, the 0 wt.% % GNP support was impossible to be observed under fluorescence microscopy due to the fact that the PLA-HA matrix absorbed the stain which made the cells undistinguishable from the substrate.

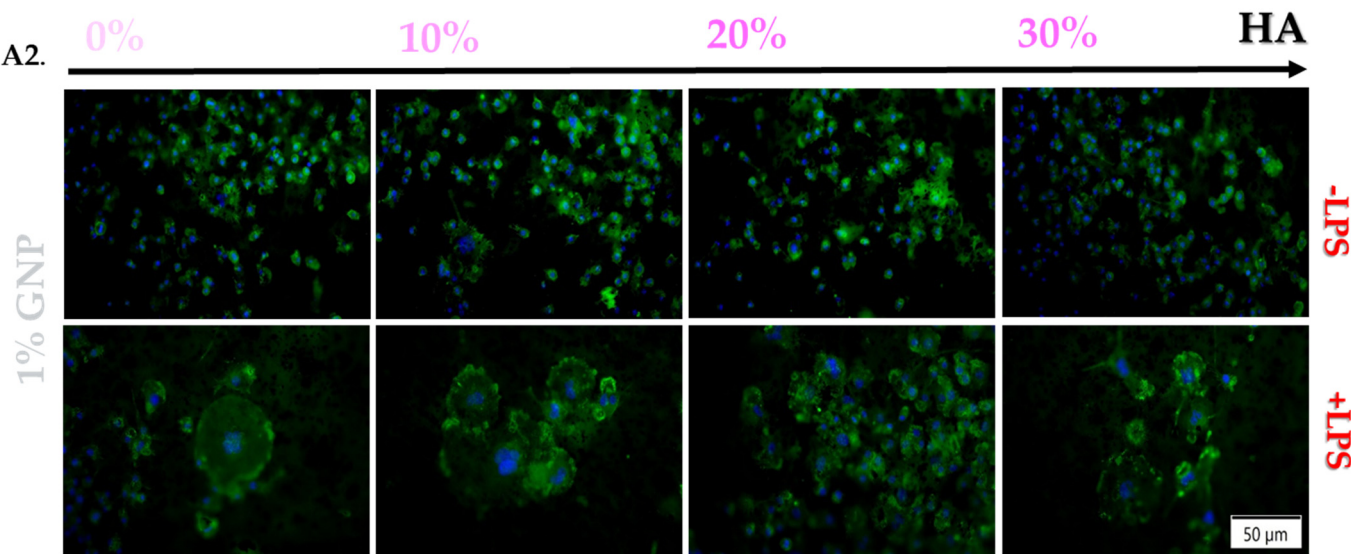

B2.

| Sample (-LPS) |        | Total number of nuclei | Number of nuclei in multinuclear cells | Multinuclear index (%) |
|---------------|--------|------------------------|----------------------------------------|------------------------|
| 1% GNP        | 0% HA  | 129                    | 7                                      | 5.4%                   |
|               | 10% HA | 101                    | 3                                      | 3.12%                  |
|               | 20% HA | 58                     | 3                                      | 5.1%                   |
|               | 30% HA | 99                     | 3                                      | 3.03%                  |

  

| Sample (+LPS) |        | Total number of nuclei | Number of nuclei in multinucleate cells | Multinuclear index (%) |
|---------------|--------|------------------------|-----------------------------------------|------------------------|
| 1% GNP        | 0% HA  | 60                     | 5                                       | 8.3%                   |
|               | 10% HA | 59                     | 3                                       | 5.8%                   |
|               | 20% HA | 54                     | 6                                       | 11.1%                  |
|               | 30% HA | 59                     | 6                                       | 10.1%                  |

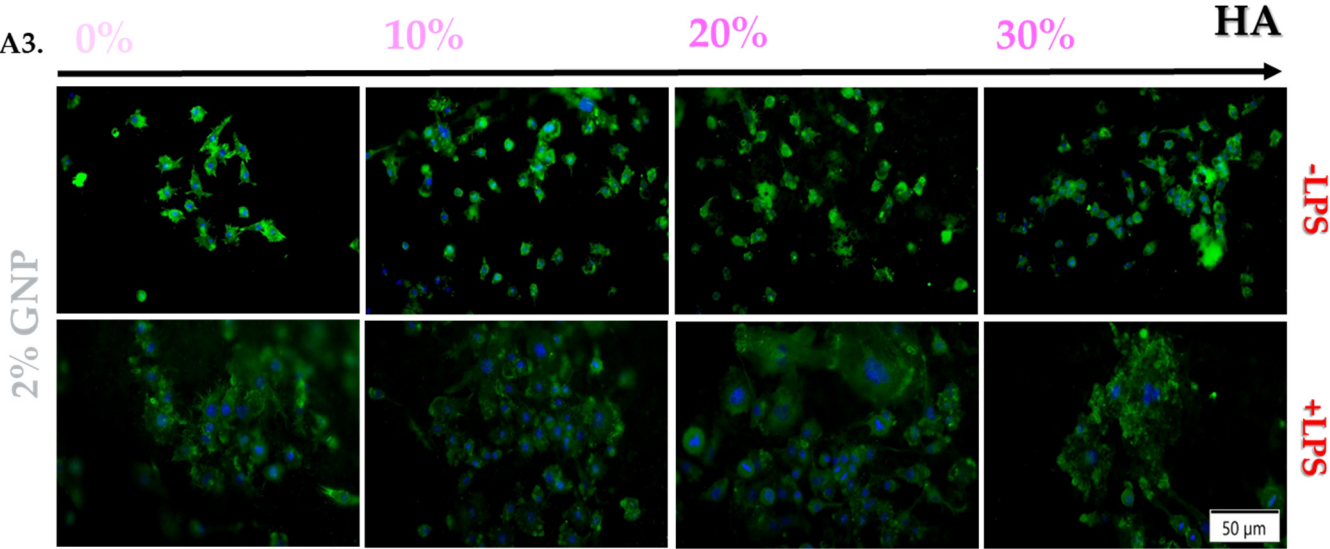

B3.

| Sample (-LPS) |        | Total number of nuclei | Number of nuclei in multinuclear cells | Multinuclear index (%) |
|---------------|--------|------------------------|----------------------------------------|------------------------|
| 2% GNP        | 0% HA  | 19                     | 0                                      | 0%                     |
|               | 10% HA | 53                     | 3                                      | 5.66%                  |
|               | 20% HA | 47                     | 0                                      | 0%                     |
|               | 30% HA | 63                     | 3                                      | 4.76%                  |

| Sample (+LPS) |        | Total number of nuclei | Number of nuclei in multinucleate cells | Multinuclear index (%) |
|---------------|--------|------------------------|-----------------------------------------|------------------------|
| 2% GNP        | 0% HA  | 38                     | 3                                       | 7.8%                   |
|               | 10% HA | 36                     | 3                                       | 8.3%                   |
|               | 20% HA | 74                     | 6                                       | 9.6%                   |
|               | 30% HA | 27                     | 3                                       | 11.1%                  |

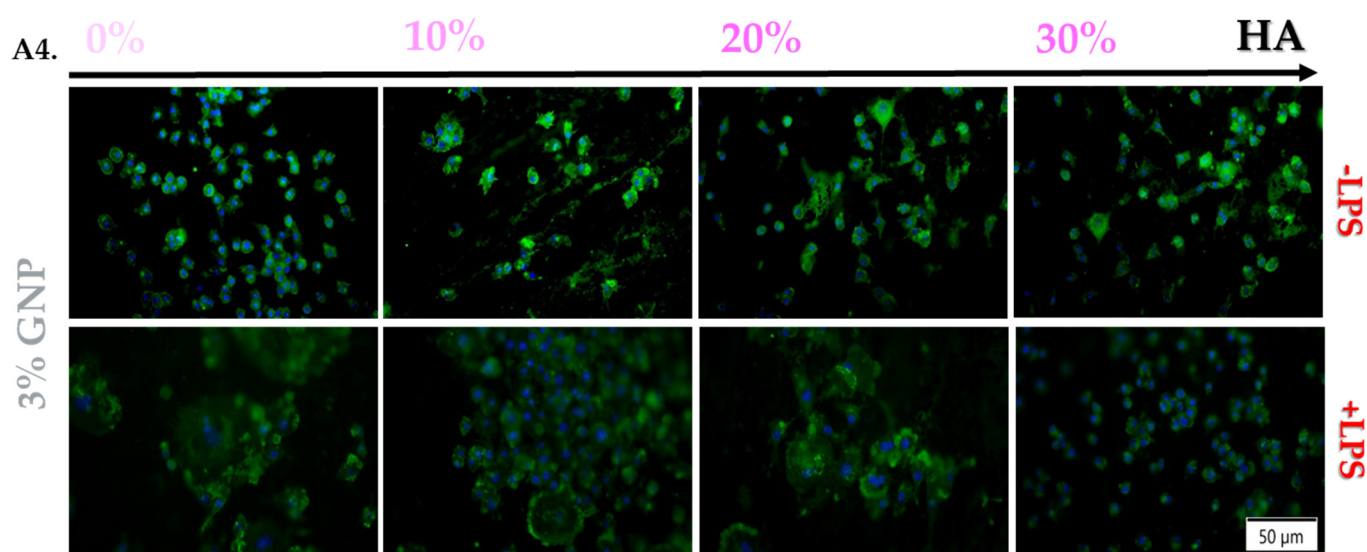

**B4.**

| Sample (-LPS) |        | Total number of nuclei | Number of nuclei in multinuclear cells | Multinuclear index (%) |
|---------------|--------|------------------------|----------------------------------------|------------------------|
| 3% GNP        | 0% HA  | 59                     | 3                                      | 5.08%                  |
|               | 10% HA | 38                     | 3                                      | 7.8%                   |
|               | 20% HA | 58                     | 0                                      | 0%                     |
|               | 30% HA | 75                     | 3                                      | 4%                     |

  

| Sample (+LPS) |        | Total number of nuclei | Number of nuclei in multinucleate cells | Multinuclear index (%) |
|---------------|--------|------------------------|-----------------------------------------|------------------------|
| 3% GNP        | 0% HA  | 59                     | 3                                       | 5.08%                  |
|               | 10% HA | 63                     | 3                                       | 6.3%                   |
|               | 20% HA | 141                    | 3                                       | 2.11%                  |
|               | 30% HA | 130                    | 3                                       | 2.3%                   |

**Figure S2 (A1-A4).** Representative fluorescence images highlighting the formation of multinucleated FBGC both under standard (-LPS) and pro-inflammatory conditions (+LPS, stimulation with 100 ng/ml LPS) (actin cytoskeleton – green fluorescence; nuclei- blue fluorescence). Scale bar represents 50  $\mu$ m; **(B1-B4)** The values of the “multinuclear index” as determined by examining 10–14 microscopic fields for each sample. The TCPS (-) and TCPS (+) notations denote the negative and positive controls for inflammation, respectively.
